# Supplementary material for: Low-level isoprene observed during summertime at a forested mountaintop site in southern China: implications for strong regional atmospheric oxidative capacity
Source: Copernicus journal article supplement (doi:10.5194/acp-2018-336), 2018-05-16
Supplement: Supplementary file 1 [file acp-2018-336-supplement.pdf]

# 1 *Supplement of*

2

## 3 **Low-level isoprene observed during summertime at a forested mountaintop** 4 **site in southern China: implications for strong regional atmospheric** 5 **oxidative capacity**

6

7 **Daocheng Gong and Hao Wang et al.**

8

9 *Correspondence to:*

10 Boguang Wang ([tbongue@jnu.edu.cn](mailto:tbongue@jnu.edu.cn))

11

### 12 **Text S1. Calculation of the atmospheric reaction time of isoprene**

13 The atmospheric reaction time of isoprene was estimated from the parameterization method through the  
14 empirical relationship between isoprene and its oxidation products MVK and MACR, based on the  
15 assumption that the processing time of the air mass was identical for MACR and MVK and there were no  
16 additional sources of MACR and MVK apart from the oxidation of isoprene. A chemical kinetic calculation  
17 is simplified to the following analytical expression for the MVK/isoprene and MACR/isoprene ratio. In this  
18 “back-of-the-envelope” approach, we have assumed that the rates of turbulent mixing and horizontal  
19 convection are similar for all three compounds, *i.e.*, the difference in the rate does not play a significant role  
20 during the time of transport from the nearby forest canopy to the altitude of the observation (Kuhn et al.,  
21 2007).

22 The chemical loss of isoprene (ISO) by reaction with OH during the day, and with NO<sub>3</sub> during the night,  
23 can be described by the following reactions:

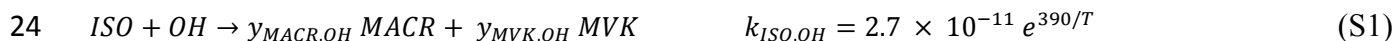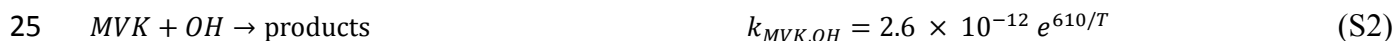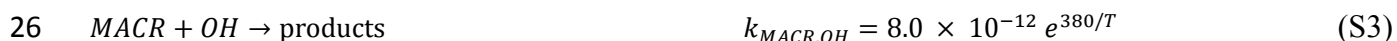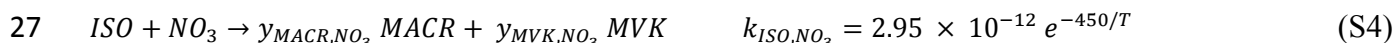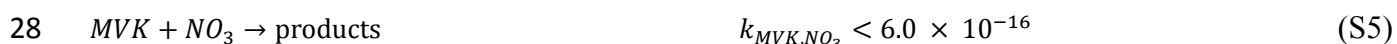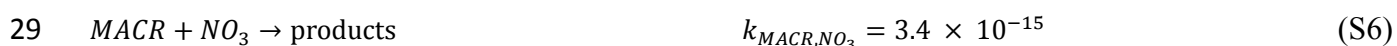

1 Where  $k$  are the temperature dependent reaction rate coefficients taken from the IUPAC database  
2 (<http://iupac.pole-ether.fr/>) (Atkinson et al., 2006).  $y$  are yields of MVK and MACR from isoprene reaction  
3 with OH and NO<sub>3</sub>.  $T$  is temperature (unit in K).

4 The yields from OH-initiated isoprene oxidation are a nonlinear function of nitrogen oxide (NO). Previous  
5 applications of this method (de Gouw, 2005; Karl et al., 2007; Kuhn et al., 2007; Roberts et al., 2006;  
6 Stroud et al., 2001) have assumed lab-derived high-NO yields of 0.33 and 0.23 for MVK and MACR,  
7 respectively (Atkinson and Arey, 2003b), but this may not be appropriate in the present case. In this study,  
8 we chose the results in Master Chemical Mechanism (MCM) v3.3.1 (Jenkin et al., 2015). The resulting  
9 yield curves are interpolated to observed NO mixing ratios (**Fig. S1**).

10 The yields from NO<sub>3</sub>-initiated isoprene oxidation are constants (**Table S1**).

11 Integration of the kinetic equations for this system shows that the product/parent ratios are a function of the  
12 rate constants ( $k$ ), yield ( $y$ ), reaction time ( $\Delta t$ ) and radical concentration. In the case of daytime MACR, for  
13 example,

$$14 \frac{[MACR]}{[ISO]} = \frac{y_{MACR,OH} k_{ISO,OH}}{(k_{MACR,OH} - k_{ISO,OH})} \times [1 - e^{(k_{ISO,OH} - k_{MACR,OH}) [OH] \Delta t}] \quad (S1)$$

15 Where the [ISO], [MACR] and [OH] are the reactant concentrations (number densities, in molecules cm<sup>-3</sup>).

16 The reaction time ( $\Delta t$ ) implied by any observed daughter/parent ratio depends on the concentration of  
17 radical (*i.e.*, OH and NO<sub>3</sub>), which was not measured and varies as an air mass ages. Rather than assume a  
18 single “typical” value for OH, we express reaction time in terms of “exposure”, defined here as the product  
19 of radical concentration and reaction time. Then, exposures can be calculated from observed  
20 daughter/parent ratios by inverting Eq. (S1), In the case of daytime MACR, for example,

$$21 [OH] \Delta t = \frac{\ln\left(1 - \frac{[MACR]}{[ISO]} \times \frac{k_{MACR,OH} - k_{ISO,OH}}{y_{MACR,OH} k_{ISO,OH}}\right)}{(k_{ISO,OH} - k_{MACR,OH})} \quad (S2)$$

22 Also, the atmospheric reaction time of isoprene can be calculated based on the modeled OH and NO<sub>3</sub>  
23 concentrations in this study.

## 24 **Text S2. Photochemical age of the air mass**

25 Similar to the above exposure calculation methods, we chose three pairs of VOC species: toluene/benzene,  
26 ethylbenzene/benzene and m,p-xylene/benzene to calculate the photochemical age of the air mass.

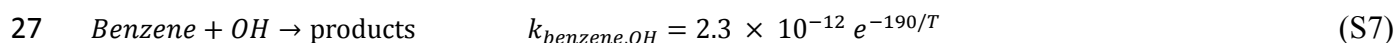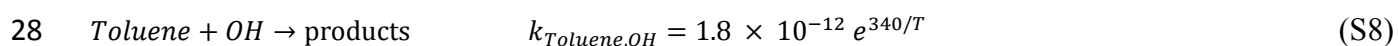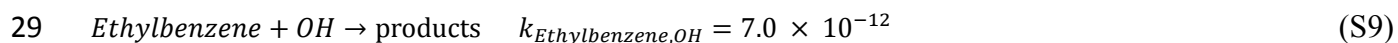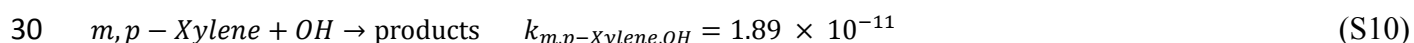

1 Toluene, ethylbenzene and m,p-xylene react faster with hydroxyl radicals (OH) than benzene. Then  
2 photochemical age is determined by the following equation:

$$3 \quad PA_{T/B} = \frac{1}{[OH](k_{T,OH} - k_{B,OH})} \times \left[ \ln \left( \frac{[T]}{[B]} \right)_0 - \ln \left( \frac{[T]}{[B]} \right) \right] \quad (S3)$$

$$4 \quad PA_{X/B} = \frac{1}{[OH](k_{X,OH} - k_{B,OH})} \times \left[ \ln \left( \frac{[X]}{[B]} \right)_0 - \ln \left( \frac{[X]}{[B]} \right) \right] \quad (S4)$$

$$5 \quad PA_{E/B} = \frac{1}{[OH](k_{E,OH} - k_{B,OH})} \times \left[ \ln \left( \frac{[E]}{[B]} \right)_0 - \ln \left( \frac{[E]}{[B]} \right) \right] \quad (S5)$$

6 Here,  $PA_{T/B}$ ,  $PA_{X/B}$  and  $PA_{E/B}$  denote the calculated photochemical age by three methods.  $[B]$ ,  $[T]$ ,  $[X]$  and  
7  $[E]$  represent the mixing ratios of benzene, toluene, m,p-xylene and ethylbenzene, respectively.  $k_{B,OH}$ ,  $k_{T,OH}$ ,  
8  $k_{X,OH}$  and  $k_{E,OH}$  indicate the OH reaction rate coefficient of benzene, toluene, m,p-xylene and ethylbenzene,  
9 respectively.  $[OH]$  represents the modeled concentrations of OH radical.  $([T]/[B])_0$ ,  $([X]/[B])_0$  and  $([E]/[B])_0$   
10 is the initial concentration ratio of toluene/benzene, ethylbenzene/benzene and m,p-xylene/benzene in fresh  
11 emissions, *i.e.*, the initial emission ratio before aging begins.  $[T]/[B]$ ,  $[X]/[B]$  and  $[E]/[B]$  is the measured  
12 concentration ratio. As presented in Fig. S2, we chose 6, 1.5 and 1.4 molecules  $\text{cm}^{-3}$  / molecules  $\text{cm}^{-3}$  as the  
13 initial emission ratios of toluene to benzene, ethylbenzene to benzene and m,p-xylene to benzene, as they  
14 were the largest ratios in diurnal variations for the study.

### 15 **Text S3. Data analysis and graph plotting by R**

16 Data analysis and graph plotting were performed using the open source R package “openair” (Carslaw,  
17 2015; Carslaw and Ropkins, 2012). Specifically, for those dedicated functions for data analysis and plots  
18 generated in openair, the “transform”, “selectByDate”, “merge” and “subset” functions were used to  
19 calculate and filter the data; the “quantile”, “summary” and “t.test” functions were used to do statistical  
20 analysis. The “timePlot” function was used to plot time series of measured species. The “plot” function was  
21 used to plot scatter and diagram diurnal variations.

### 22 **References**

- 23 Atkinson, R., Arey, J., 2003a. Atmospheric degradation of volatile organic compounds. *Chem Rev* 103, 4605-4638.  
24 Atkinson, R., Arey, J., 2003b. Gas-phase tropospheric chemistry of biogenic volatile organic compounds: a review. *Atmos*  
25 *Environ* 37, S197-S219.  
26 Atkinson, R., Baulch, D.L., Cox, R.A., Crowley, J.N., 2006. Evaluated kinetic and photochemical data for atmospheric  
27 chemistry: Volume II – gas phase reactions of organic species. *Atmospheric Chemistry and Physics (ACP) & Discussions*  
28 (ACPD).  
29 Carslaw, D.C., 2015. The openair manual — open-source tools for analysing air pollution data. Manual for version 1.1-4, King’s  
30 College London.

1 Carslaw, D.C., Ropkins, K., 2012. openair - An R package for air quality data analysis. *Environmental Modelling & Software* 27-  
2 28, 52-61.

3 Cheng, H.R., Guo, H., Saunders, S.M., Lam, S.H.M., Jiang, F., Wang, X.M., Simpson, I.J., Blake, D.R., Louie, P.K.K., Wang,  
4 T.J., 2010. Assessing photochemical ozone formation in the Pearl River Delta with a photochemical trajectory model.  
5 *Atmospheric Environment* 44, 4199-4208.

6 de Gouw, J.A., 2005. Budget of organic carbon in a polluted atmosphere: Results from the New England Air Quality Study in  
7 2002. *Journal of Geophysical Research* 110, 22.

8 Guo, H., Ling, Z.H., Cheung, K., Jiang, F., Wang, D.W., Simpson, I.J., Barletta, B., Meinardi, S., Wang, T.J., Wang, X.M.,  
9 Saunders, S.M., Blake, D.R., 2013. Characterization of photochemical pollution at different elevations in mountainous areas in  
10 Hong Kong. *Atmos Chem Phys* 13, 3881-3898.

11 Jenkin, M.E., Saunders, S.M., Pilling, M.J., 1997. The tropospheric degradation of volatile organic compounds: A protocol for  
12 mechanism development. *Atmospheric Environment* 31, 81-104.

13 Jenkin, M.E., Saunders, S.M., Wagner, V., Pilling, M.J., 2003. Protocol for the development of the Master Chemical Mechanism,  
14 MCM v3 (Part B): tropospheric degradation of aromatic volatile organic compounds. *Atmos Chem Phys* 3, 181-193.

15 Jenkin, M.E., Young, J.C., Rickard, A.R., 2015. The MCM v3.3.1 degradation scheme for isoprene. *Atmos Chem Phys* 15,  
16 11433-11459.

17 Karl, T., Guenther, A., Yokelson, R.J., Greenberg, J., Potosnak, M., Blake, D.R., Artaxo, P., 2007. The tropical forest and fire  
18 emissions experiment: Emission, chemistry, and transport of biogenic volatile organic compounds in the lower atmosphere over  
19 Amazonia. *Journal of Geophysical Research-Atmospheres* 112, 17.

20 Kuhn, U., Andreae, M.O., Ammann, C., Araujo, A.C., Brancaleoni, E., Ciccioli, P., Dindorf, T., Frattoni, M., Gatti, L.V.,  
21 Ganzeveld, L., Kruijt, B., Lelieveld, J., Lloyd, J., Meixner, F.X., Nobre, A.D., Poschl, U., Spirig, C., Stefani, P., Thielmann, A.,  
22 Valentini, R., Kesselmeier, J., 2007. Isoprene and monoterpene fluxes from Central Amazonian rainforest inferred from tower-  
23 based and airborne measurements, and implications on the atmospheric chemistry and the local carbon budget. *Atmos Chem*  
24 *Phys* 7, 2855-2879.

25 Ling, Z.H., Guo, H., Lam, S.H.M., Saunders, S.M., Wang, T., 2014. Atmospheric photochemical reactivity and ozone production  
26 at two sites in Hong Kong: Application of a master chemical mechanism - photochemical box model. *Journal of Geophysical*  
27 *Research: Atmospheres*, 2014JD021794.

28 Roberts, J.M., Marchewka, M., Bertman, S.B., Goldan, P., Kuster, W., de Gouw, J., Warneke, C., Williams, E., Lerner, B.,  
29 Murphy, P., Apel, E., Fehsenfeld, F.C., 2006. Analysis of the isoprene chemistry observed during the New England Air Quality  
30 Study (NEAQS) 2002 intensive experiment. *Journal of Geophysical Research-Atmospheres* 111.

31 Saunders, S.M., Jenkin, M.E., Derwent, R.G., Pilling, M.J., 2003. Protocol for the development of the Master Chemical  
32 Mechanism, MCM v3 (Part A): tropospheric degradation of non-aromatic volatile organic compounds. *Atmos Chem Phys* 3, 161-  
33 180.

34 Stroud, C.A., Roberts, J.M., Goldan, P.D., Kuster, W.C., Murphy, P.C., Williams, E.J., Hereid, D., Parrish, D., Sueper, D.,  
35 Trainer, M., Fehsenfeld, F.C., Apel, E.C., Riemer, D., Wert, B., Henry, B., Fried, A., Martinez-Harder, M., Harder, H., Brune,  
36 W.H., Li, G., Xie, H., Young, V.L., 2001. Isoprene and its oxidation products, methacrolein and methylvinyl ketone, at an urban  
37 forested site during the 1999 Southern Oxidants Study. *Journal of Geophysical Research-Atmospheres* 106, 8035-8046.

38

## 1 Tables

2 **Table S1: Rate constants and lifetime for isoprene, MVK and MACR, and yields of MVK and MACR from the**  
 3 **isoprene reactions.**

| Compound | Rate constants <sup>a</sup> with |                       |                       | Yield <sup>b</sup> from isoprene reaction with /<br>(lifetime <sup>b</sup> for reaction with) |                 |                |
|----------|----------------------------------|-----------------------|-----------------------|-----------------------------------------------------------------------------------------------|-----------------|----------------|
|          | OH                               | NO <sub>3</sub>       | O <sub>3</sub>        | OH                                                                                            | NO <sub>3</sub> | O <sub>3</sub> |
| Isoprene | 1.0×10 <sup>-10</sup>            | 7.0×10 <sup>-13</sup> | 1.3×10 <sup>-17</sup> | -/ 0.4 h                                                                                      | -/ 0.8 h        | -/ 24 h        |
| MVK      | 2.0×10 <sup>-11</sup>            | 3.2×10 <sup>-16</sup> | 5.2×10 <sup>-18</sup> | 0.33 / 1.9 h                                                                                  | 0.035 / 0.5 yr  | 0.16 / 61 h    |
| MACR     | 2.9×10 <sup>-11</sup>            | 3.7×10 <sup>-15</sup> | 1.2×10 <sup>-18</sup> | 0.23 / 1.0 h                                                                                  | 0.035 / 72 h    | 0.41 / 10 d    |

4 <sup>a</sup>(Atkinson et al., 2006) and references therein, unit in cm<sup>3</sup> molecule<sup>-1</sup> s<sup>-1</sup>, temperature in 298 K.

5 <sup>b</sup>(Atkinson and Arey, 2003a, b) and references therein. Lifetime calculated using the following: for OH radical reactions, a 12-h  
 6 daytime average of 8.0 × 10<sup>6</sup> molecules cm<sup>-3</sup>; for NO<sub>3</sub> radical reactions, a 12-h nighttime average of 5.0 × 10<sup>8</sup> molecules cm<sup>-3</sup>;  
 7 and for O<sub>3</sub>, a 24-h average of 1.0 × 10<sup>12</sup> molecules cm<sup>-3</sup>.

8

## 9 Figures

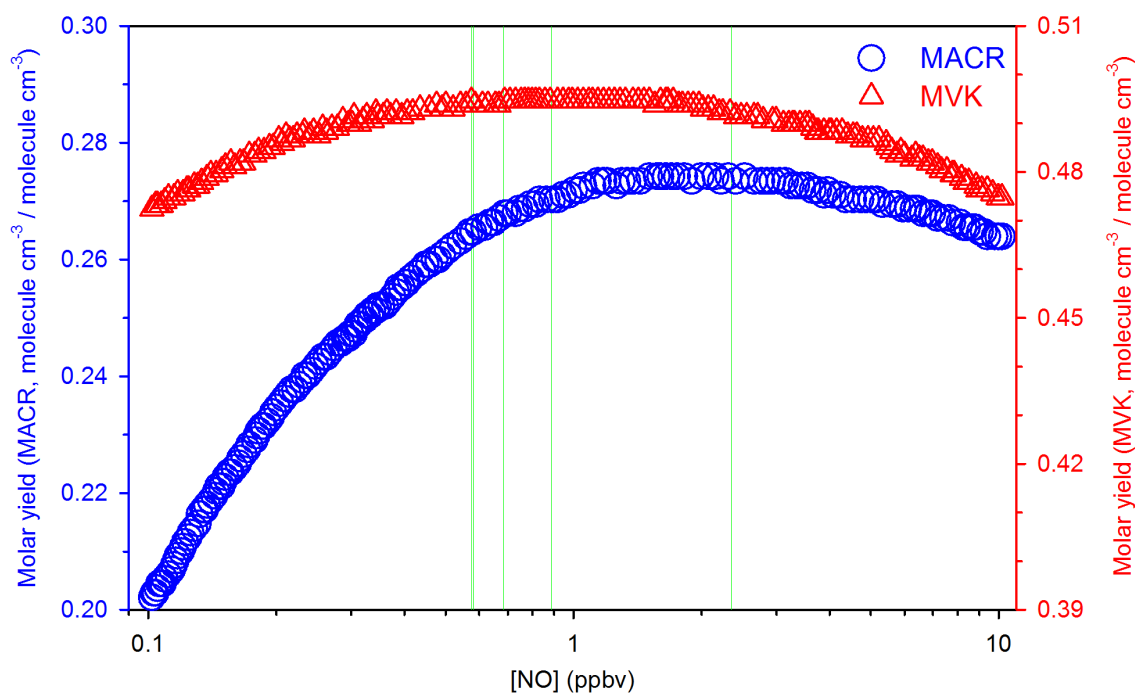

10

11 **Fig. S1: Molar yields of the main first-generation products (MVK and MACR) of the OH-initiated oxidation of**  
 12 **isoprene as a function of NO mixing ratio, at 298 K, as represented in MCM v3.3.1 (Jenkin et al., 2015). Thin green**  
 13 **vertical lines denote, from left to right, the 1<sup>st</sup>, 5<sup>th</sup>, 50<sup>th</sup>, 95<sup>th</sup> and 99<sup>th</sup> percentiles of hourly NO observed during the**  
 14 **present study.**

15

16

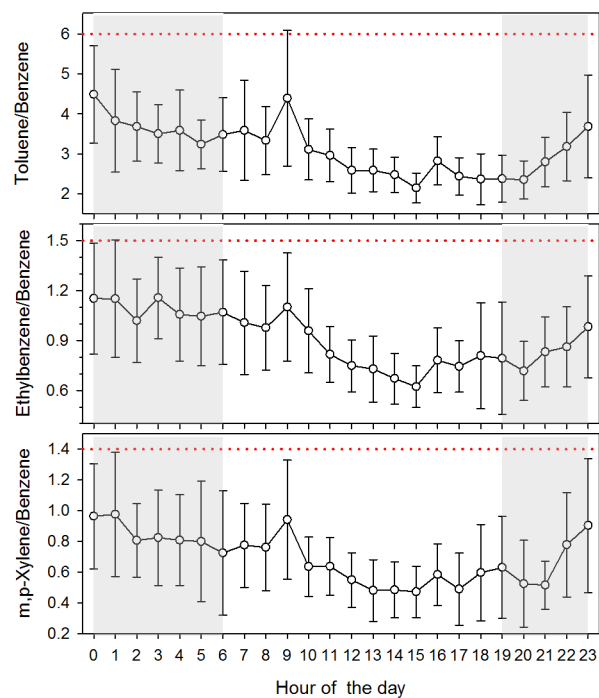

1

2 **Fig. S2.** Ratios of toluene to benzene, ethylbenzene to benzene and m,p-xylene to benzene in Nanling site in Jul.-  
 3 Aug. 2016. Red dotted line denotes the highest ratio, assumed as the initial emission ratios of 6, 1.5 and 1.4  
 4 molecules cm<sup>-3</sup> / molecules cm<sup>-3</sup>, respectively. Shaded regions denote the nighttime periods. Error bars indicate the  
 5 95% confidence interval.

6
