# Supplementary material for: Low-level isoprene observed during summertime at a forested mountaintop site in southern China: implications for strong regional atmospheric oxidative capacity
Source: Copernicus journal article supplement (doi:10.5194/acp-2018-336), 2018-05-16
Supplement: Supplementary file [file acp-2018-336-AC1-supplement.pdf]

***Interactive comment on “Low-level isoprene observed during summertime at a forested mountaintop site in southern China: Implications for strong regional atmospheric oxidative capacity” by Daocheng Gong et al.***

Daocheng Gong and Hao Wang et al.

*Corresponding to: [tbongue@jnu.edu.cn](mailto:tbongue@jnu.edu.cn)*

Dear Referee #3,

We greatly appreciate the time and effort that you spent in reviewing our manuscript. The comments are really thoughtful and helpful to improve the quality of our paper. Most of the modifications were made in the manuscript and below are point-by-point response to these comments. There follows a list of referee comments (**in black**), together with our response (**in blue**) and details of corrections/improvements to the manuscript (**in red**).

---

Gong et al. presents their results of online observations of isoprene and its first-stage oxidation products MVK and MACR in summer 2016 at a remote, high-altitude mountain forest site to the north of the air-polluted PRD region in southern China. They found that the isoprene level was significantly lower and attributed it to the strong regional atmospheric oxidative capacity. The PBM-MCM model was used to estimate the OH and NO<sub>3</sub> concentrations to support their assumptions. The paper is well written and organized. The reviewer would recommend the manuscript for publication after some specific comments.

Response: We thank the referee for this overview. We have made changes to the manuscript based on the referee's helpful comments.

---

**Specific Comments:**

-1. O<sub>3</sub>, OH<sub>x</sub>, PAN, and NO<sub>3</sub> are indicators of atmospheric oxidative capacity. Since OH and NO<sub>3</sub> were not determined in the observation, the observed O<sub>3</sub> concentration is a more powerful tool to express the atmospheric oxidative capacity. The diurnal variations of O<sub>3</sub> peaked at 20:00 is very interesting, because the changing trends of O<sub>3</sub> and sun radiation were not accordant. The temporal variations of O<sub>3</sub> also show different trends during the observation. Could regional transport contribute O<sub>3</sub> to the measurement site? The authors had better add more discussion on the variations of O<sub>3</sub> concentration.

Response: Many thanks for spotting this. We noticed that the high levels of O<sub>3</sub>, as well as its distinct diurnal variations, were observed at the site, and we are preparing another paper to discuss these points in details. In this revised manuscript, discussions about the high abundances of O<sub>3</sub> at the site has been added in the Section 3.1. As for the interesting O<sub>3</sub> diurnal variations, a number of studies have observed a similar pattern at mountaintops, that is, high concentrations at night and low concentrations during the daytime (Gallardo et al., 2000;Gao et al., 2017). Some previous studies have concluded that the factors closely related to the distinct O<sub>3</sub> diurnal patterns at mountaintops were the boundary layer diurnal cycles (Gao et al., 2017), the mountain-valley breezes (Zaveri et al., 1995;Yang et al., 2012;Cristofanelli et al., 2013), the regional transport effects (Naja et al., 2003;Li et al., 2008;Zhang et al., 2015;Gao et al., 2017), the location and altitude of a mountain (Chevalier et al., 2007;Monteiro et al., 2012), and ozone vertical distributions (Forrer et al., 2000;Zellweger et al., 2003;Gheusi et al., 2011). Overall, the distinct diurnal variations in O<sub>3</sub> concentrations are the result of a combination of various physical and chemical processes. This point has been added to the Section 3.2.

In the Section 3.1:" High abundances of O<sub>3</sub> at this site likely indicate strong oxidizing power of the present remote atmospheres."

In the Section 3.2:" Some previous studies at mountaintops observed distinct diurnal variations in O<sub>3</sub> concentrations that featured with high levels at night and low levels during the daytime (Zaveri et al.,

1995;Gao et al., 2017), which are the result of a combination of various physical and chemical processes (e.g., boundary layer diurnal cycles, mountain-valley breezes, regional transport, photochemical reactions).”

*References:*

- Zaveri, R. A., Saylor, R. D., Peters, L. K., McNider, R., and SonG, A.: A model investigation of summertime diurnal ozone behavior in rural mountainous locations, *Atmos Environ*, 29, 1043-1065, 1995.
- Forrer, J., Ruttimann, R., Schneiter, D., Fischer, A., Buchmann, B., and Hofer, P.: Variability of trace gases at the high-Alpine site Jungfraujoch caused by meteorological transport processes, *Journal of Geophysical Research-Atmospheres*, 105, 12241-12251, Doi 10.1029/1999jd901178, 2000.
- Gallardo, L., Carrasco, J., and Olivares, G.: An analysis of ozone measurements at Cerro Tololo (30 degrees S, 70 degrees W, 2200 m.a.s.l.) in Chile, *Tellus Series B-Chemical and Physical Meteorology*, 52, 50-59, DOI 10.1034/j.1600-0889.2000.00959.x, 2000.
- Naja, M., Lal, S., and Chand, D.: Diurnal and seasonal variabilities in surface ozone at a high altitude site Mt Abu (24.6 degrees N, 72.7 degrees E, 1680 m asl) in India, *Atmos Environ*, 37, 4205-4215, 10.1016/s1352-2310(03)00565-x, 2003.
- Zellweger, C., Forrer, J., Hofer, P., Nyeki, S., Schwarzenbach, B., Weingartner, E., Ammann, M., and Baltensperger, U.: Partitioning of reactive nitrogen (NO<sub>y</sub>) and dependence on meteorological conditions in the lower free troposphere, *Atmos Chem Phys*, 3, 779-796, 2003.
- Chevalier, A., Gheusi, F., Delmas, R., Ordóñez, C., Sarrat, C., Zbinden, R., Thouret, V., Athier, G., and Cousin, J. M.: Influence of altitude on ozone levels and variability in the lower troposphere: a ground-based study for western Europe over the period 2001-2004, *Atmos Chem Phys*, 7, 4311-4326, DOI 10.5194/acp-7-4311-2007, 2007.
- Li, J., Pochanart, P., Wang, Z. F., Liu, Y., Yamaji, K., Takigawa, M., Kanaya, Y., and Akimoto, H.: Impact of Chemical Production and Transport on Summertime Diurnal Ozone Behavior at a Mountainous Site in North China Plain, *Sola*, 4, 121-124, 10.2151/sola.2008-031, 2008.
- Gheusi, F., Ravetta, F., Delbarre, H., Tsamalis, C., Chevalier-Rosso, A., Leroy, C., Augustin, P., Delmas, R., Ancellet, G., Athier, G., Bouchou, P., Campistron, B., Cousin, J. M., Fourmentin, M., and Meyerfeld, Y.: Pic 2005, a field campaign to investigate low-tropospheric ozone variability in the Pyrenees, *Atmos Res*, 101, 640-665, 10.1016/j.atmosres.2011.04.014, 2011.
- Monteiro, A., Strunk, A., Carvalho, A., Tchepel, O., Miranda, A. I., Borrego, C., Saavedra, S., Rodriguez, A., Souto, J., Casares, J., Friese, E., and Elbern, H.: Investigating a high ozone episode in a rural mountain site, *Environmental pollution*, 162, 176-189, 10.1016/j.envpol.2011.11.008, 2012.
- Yang, C. F. O., Lin, N. H., Sheu, G. R., Lee, C. T., and Wang, J. L.: Seasonal and diurnal variations of ozone at a high-altitude mountain baseline station in East Asia, *Atmos Environ*, 46, 279-288, 10.1016/j.atmosenv.2011.09.060, 2012.
- Cristofanelli, P., di Carlo, P., Altorio, A., Dari Salisburgo, C., Tuccella, P., Biancofiore, F., Stocchi, P., Verza, G. P., Landi, T. C., Marinoni, A., Calzolari, F., Duchi, R., and Bonasoni, P.: Analysis of Summer Ozone Observations at a High Mountain Site in Central Italy (Campo Imperatore, 2388 m a.s.l.), *Pure Appl. Geophys.*, 170, 1985-1999, 10.1007/s00024-012-0630-1, 2013.
- Zhang, L., Jin, L. J., Zhao, T. L., Yin, Y., Zhu, B., Shan, Y. P., Guo, X. M., Tan, C. H., Gao, J. H., and Wang, H. L.: Diurnal variation of surface ozone in mountainous areas: Case study of Mt. Huang, East China, *Science of the Total Environment*, 538, 583-590, 10.1016/j.scitotenv.2015.08.096, 2015.

*Gao, J., Zhu, B., Xiao, H., Kang, H., Hou, X., Yin, Y., Zhang, L., and Miao, Q.: Diurnal variations and source apportionment of ozone at the summit of Mount Huang, a rural site in Eastern China, Environmental pollution, 222, 513-522, 10.1016/j.envpol.2016.11.031, 2017.*

---

**-2.** The modelled OH and NO<sub>3</sub> concentrations were regarded as the most important evidence for the conclusion of this manuscript. However, the PBM-MCM model is not a good tool to estimate OH concentrations at low NO<sub>x</sub> concentrations at remote site like this study. The reviewer strongly recommend the authors add some other models to support their conclusions.

Response: Thanks for this comment. We agree with the referee that PBM-MCM indeed needs improvement and further optimization for its application under low-NO<sub>x</sub> environments.

Thus on one hand we conducted sensitivity analyses of the PBM-MCM modelled OH concentrations with certain uncertainties. The results showed that the current PBM-MCM may have 19 ± 9% overestimation of the daytime OH mixing ratios at the present study. See also our response to Referee #2, comment #2 and #4 for more detailed discussion on this point.

On the other hand, a widely-used parameterization method with measured aromatic hydrocarbons has been applied to estimate the regional mixing ratios of daytime OH radicals (Shiu et al., 2007). This additional approach can provide a good complement to the current model for evaluating the atmospheric oxidative capacity in the present forest regions. We have therefore added this point in the revised manuscript and supplement. See also our response to Referee #2, comment #1 for more detailed discussion of this point.

We sincerely appreciate the suggestions made by the Referees, and agree that more observations and modeling studies will be needed to address this question. We will consider the application of other models as a better diagnostic tool in the future, e.g., OBM-AOCP (Observation-Based Model for investigating Atmospheric Oxidative Capacity and Photochemistry) developed by Xue et al. (2016).

*References:*

*Shiu, C. J., Liu, S. C., Chang, C. C., Chen, J. P., Chou, C. C. K., Lin, C. Y., and Young, C. Y.: Photochemical production of ozone and control strategy for Southern Taiwan, Atmos Environ, 41, 9324-9340, 10.1016/j.atmosenv.2007.09.014, 2007.*

*Xue, L. K., Gu, R. R., Wang, T., Wang, X. F., Saunders, S., Blake, D., Louie, P. K. K., Luk, C. W. Y., Simpson, I., Xu, Z., Wang, Z., Gao, Y., Lee, S. C., Mellouki, A., and Wang, W. X.: Oxidative capacity and radical*

*chemistry in the polluted atmosphere of Hong Kong and Pearl River Delta region: analysis of a severe photochemical smog episode, Atmos Chem Phys, 16, 9891-9903, 10.5194/acp-16-9891-2016, 2016.*

---

-3. Page 1, Line 22-23, this sentence is incomplete.

Response: Many thanks for spotting this, the correction has been made to read “To investigate the atmospheric oxidizing capacity in forested high mountain areas adjacent to the photochemistry-active Pearl River Delta (PRD) region in southern China, one-month online observations of isoprene and its first-stage oxidation products methyl vinyl ketone (MVK) and methacrolein (MACR) were conducted at a national background station in summer 2016.”.

---

-4. Page 4, Line 32, the specifications of the Teflon filter should be clarified.

Response: Many thanks for spotting this, corrections have been made to read “...a Teflon filter (0.25 µm pore size, 47 mm OD, Millipore, USA) was placed in front of the sample inlet.”.

---

-5. Page 5, Line 21-23, it is confused that “daily” and “every two days”. Secondly, it seems that SO<sub>2</sub>, NO<sub>x</sub>, and CO analyzers are usually calibrated with domestic standard gases which are not NIST-traceable. The NIST-traceable standard was only applied to calibrate O<sub>3</sub> analyzer.

Response: Many thanks for spotting this mistake, corrections have been made to read “All instruments were calibrated weekly by using a multi-gas calibrator (Model 146i, Thermo Scientific, Inc.) throughout the study. The NIST-traceable (National Institute of Standards and Technology, USA) standard was applied to calibrate the O<sub>3</sub> analyser. For NO<sub>x</sub>, SO<sub>2</sub> and CO, standard gases provided by NRCCRM (National Research Center for Certified Reference Materials, China) was applied. Zero and span checks of all analysers were performed every two days.”.

---
